# Supplementary material for: Chronic β2AR stimulation limits CFTR activation in human airway epithelia
Source: JCI journal article supplement (doi:10.1172/jci.insight.93029), 2018-02-21
Supplement: sd1 [file 1]

## Chronic $\beta$ 2AR stimulation limits CFTR activation in human airway epithelia

Brewington, John J.\*<sup>1</sup>; Backstrom, Jessica<sup>1</sup>; Feldman, Amanda<sup>1</sup>; Kramer, Elizabeth L.<sup>1</sup>;  
Moncivaiz, Jessica D.<sup>1</sup>; Ostmann, Alicia J.<sup>1</sup>; Zhu, Xiaoting<sup>2</sup>; Lu, L. Jason<sup>2</sup>; Clancy, John P.<sup>1</sup>

<sup>1</sup>Cincinnati Children's Hospital Medical Center, Department of Pediatrics, Division of Pulmonary  
Medicine

<sup>2</sup>Cincinnati Children's Hospital Medical Center, Department of Pediatrics, Division of Biomedical  
Informatics

\*Corresponding Author:

John Brewington, MD  
3333 Burnet Avenue  
MLC 2021  
Cincinnati, OH 45229  
Office: 513.636.6771  
Fax: 513.803.0724  
[john.brewington@cchmc.org](mailto:john.brewington@cchmc.org)

### **Supplemental Results**

Figure S1: Page 2

Figure S2: Page 3

Figure S3: Page 4

Table S1: Page 5

## Supplemental Figures and Figure Legends

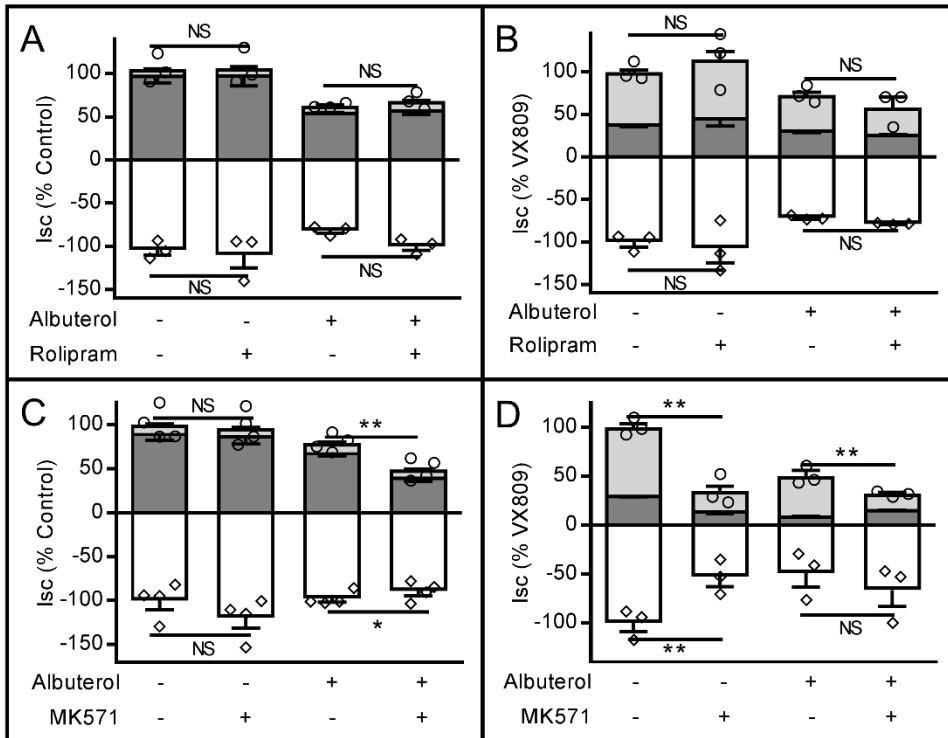

**Figure S1:**

*Chronic albuterol-induced CFTR impairment is not rescued by functional inhibition of the key spatial cAMP regulators Phosphodiesterase, isoform 4 (PDE-4) and the multidrug resistance pump 4 (MRP4).* Wild-type and VX809-corrected F508del CFTR+ CFBE41o- cells were exposed to albuterol (10 $\mu$ M) in media for 72 hours, then mounted in Ussing chambers and exposed to inhibitors of PDE-4 (rolipram, 100 $\mu$ M) or MRP4 (MK571, 20 $\mu$ M). CFTR function was then quantified under voltage clamp conditions. The addition of rolipram (100 $\mu$ M, added after forskolin/IBMX) to further inhibit PDE-4 did not rescue albuterol-induced CFTR dysfunction in either wtCFTR+ (**Panel A**, n=3 inserts/condition; circles represent total CFTR activity [cAMP+genistein], diamonds represent inhibited CFTR currents [Inh172]) or VX809-corrected F508del CFTR+ cells (**Panel B**, 3 inserts/condition). Similarly, the albuterol-induced reductions in CFTR-dependent  $I_{sc}$  in pretreated wtCFTR+ (**Panel C**, n=4 inserts/condition) and VX809-corrected F508del CFTR+ (**Panel D**, n=3 inserts/condition) CFBE41o- cells were not rescued following exposure to the MRP4 inhibitor MK571 (20 $\mu$ M, added before amiloride). All studies are internally normalized as indicated to allow for comparisons. Stimulation protocol was as follows: Amiloride (100 $\mu$ M, not shown), cAMP (forskolin 10 $\mu$ M/IBMX 100 $\mu$ M – dark grey bars), CFTR potentiator (genistein 50 $\mu$ M for wtCFTR+; VX770 1 $\mu$ M for F508del CFTR+ cells – light grey bars), and CFTR inhibition (Inh172 10 $\mu$ M – white bars). All experiments are representative of studies repeated in duplicate or triplicate with similar results. Data presented represent mean  $\pm$  SEM. \*p<0.05; \*\*p<0.01; NS: non-significant by two-way ANOVA with Tukey's multiple comparisons test.

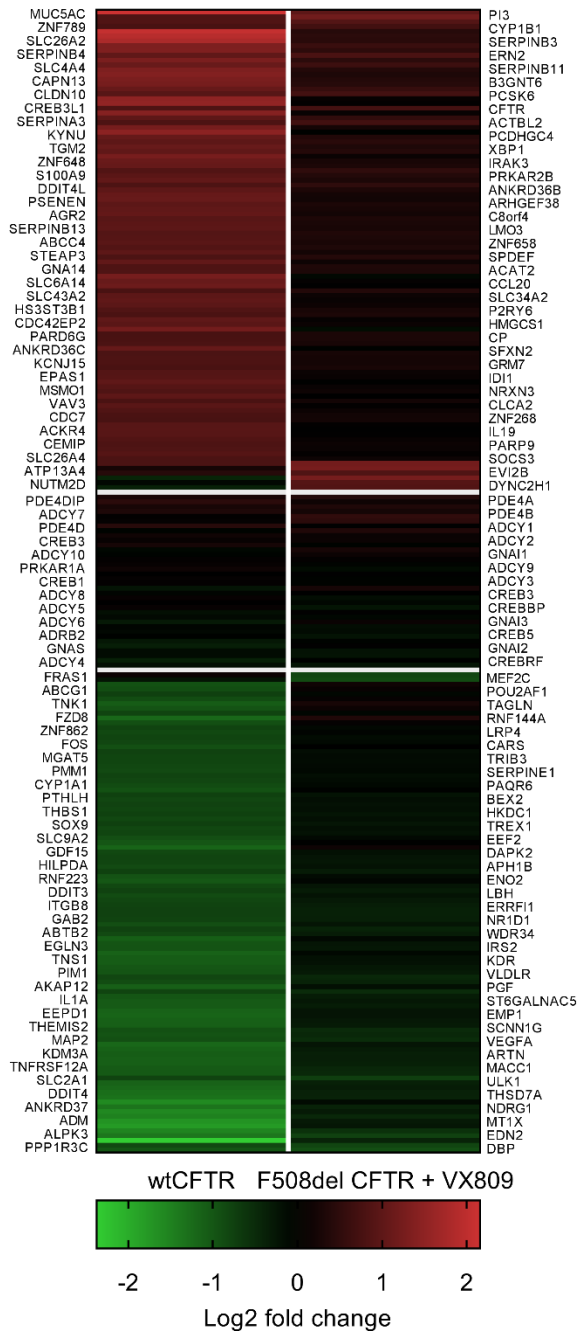

**Figure S2:**

*Transcriptional changes in primary human airway epithelial cells (HAECs) following 72 hours of albuterol exposure.*

Heatmap displaying differentially expressed genes in wtCFTR+ (left column) and VX809-corrected F508del CFTR+ primary HAECs following chronic albuterol exposure; each experimental group is compared to its same-donor baseline (untreated wtCFTR+ on the left, VX809-treated F508del CFTR+ on the right). The top 100 significantly up- or down-regulated genes are listed in the top and bottom groups, respectively; expression of genes in these columns was statistically changed with albuterol exposure, though not all reach a 2-fold change. The center group represents key genes of interest (AC isoforms, *CREB*, etc.); no genes in the center row had a significant change in expression. Key genes are noted to the left or right of their respective row (left/right placement is for spacing only and does not carry significance).

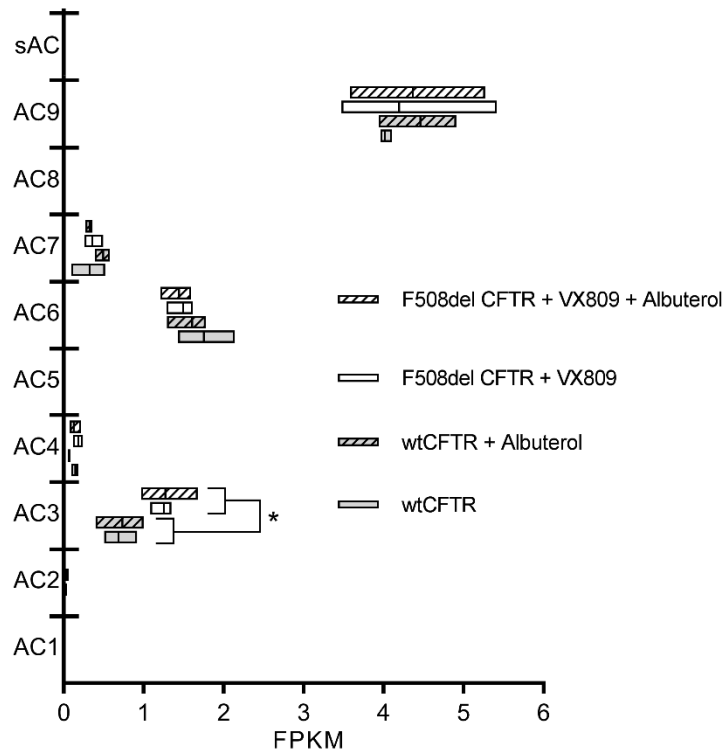

**Figure S3:**

*Expression patterns of Adenylyl Cyclase (AC) isoforms are similar between wild-type and F508del CFTR+ human airway epithelial cell (HAEC) donors, and are not modified by albuterol pre-treatment.*

Expression levels, as measured in Fragments per Kilobase of transcript per Million mapped reads (FPKM), of the nine transmembrane AC isoforms (AC1-AC9) and soluble AC (sAC) in albuterol-treated and untreated wt and VX809-corrected F508del CFTR+ primary HAECs. The isoforms of highest expression include AC3, AC6, AC7, and AC9, and expression levels are unchanged by albuterol exposure. Expression of AC3 was slightly higher in VX809-corrected F508del CFTR+ cells compared to wtCFTR+ cells; all other isoforms were similarly expressed in both cell lines.

\* $p < 0.05$  by two-way ANOVA with Tukey's multiple comparisons test.

### Supplemental Tables and Table Legends

| Primary Antibody                                             | Secondary Antibody                                   |
|--------------------------------------------------------------|------------------------------------------------------|
| Rabbit anti-CFTR (Sigma C7491); 1:100                        | FitC Goat anti-Rabbit IgG (Invitrogen 656111); 1:500 |
| Alexa Fluor 568 Phalloidin (Life Technologies A12380); 1:250 | N/A                                                  |
| Chicken anti- $\beta$ 2AR (Abcam ab13989); 1:250             | Goat anti-Chicken IgY (Abcam ab150171); 1:500        |

**Table S1:**

*Antibodies and fluorophores used for immunofluorescence.*
